# Supplementary material for: Direct construction of interconnected Si3N4 nanowire networks for enhancing the thermal conductivity and mechanical performance of flexible composite films
Source: Royal Society of Chemistry journal article supplement (doi:10.1039/d4ta02343a), 2024-01-01
Supplement: d4ta02343a1.pdf [file d4ta02343a1.pdf]

## Supporting Information

### **Direct construction interconnected Si<sub>3</sub>N<sub>4</sub> nanowires networks for enhancing thermal conductivity and mechanical performance of flexible composite films**

Mengyi Li<sup>a</sup>, Baokai Wang<sup>a</sup>, Chang Yu<sup>a</sup>, Mengyang Niu<sup>a</sup>, Kunjie Yuan<sup>a</sup>, Weiwei Xuan<sup>b</sup>,  
Ming Yue<sup>c</sup>, Lifeng Zhu<sup>a,\*</sup>, Kexin Chen<sup>d,\*</sup>, Qi Wang<sup>a,\*</sup>

<sup>a</sup> *School of Materials Science and Engineering, University of Science and Technology  
Beijing, Beijing 100083, China*

<sup>b</sup> *School of Energy and Environmental Engineering, University of Science and  
Technology Beijing, Beijing 100083, China*

<sup>c</sup> *School of Civil and Resource Engineering, University of Science and Technology  
Beijing, Beijing 100083, China*

<sup>d</sup> *State Key Laboratory for Advanced Metals and Materials, University of Science and  
Technology Beijing, Beijing, 100083, China*

\*Corresponding authors: zhu@ustb.edu.cn (L. Zhu), kxchen@ustb.edu.cn (K. Chen),  
wangqi15@ustb.edu.cn (Q. Wang)

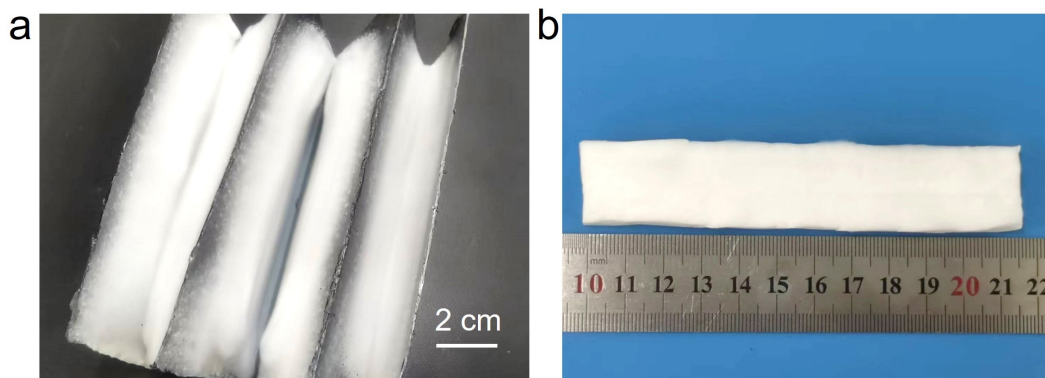

**Fig. S1** (a) Digital pictures showing the Si<sub>3</sub>N<sub>4</sub>NWs grown on the substrate of carbon paper; (b) digital picture of a large piece of Si<sub>3</sub>N<sub>4</sub>NWs paper after detaching.

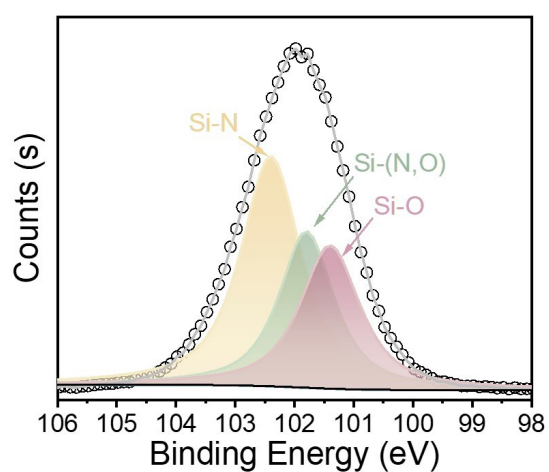

**Fig. S2** High-resolution XPS spectrum of Si 2p.

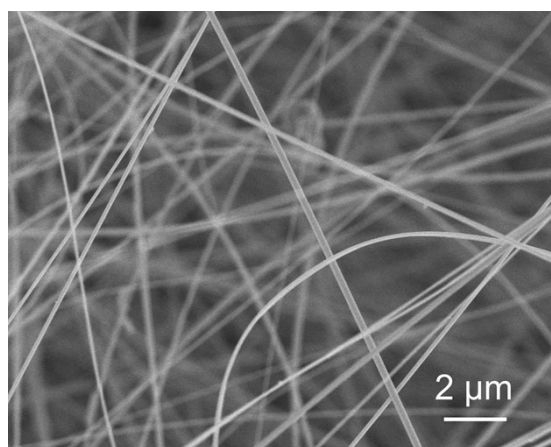

**Fig. S3** SEM image of the as-synthesized Si<sub>3</sub>N<sub>4</sub>NWs paper.

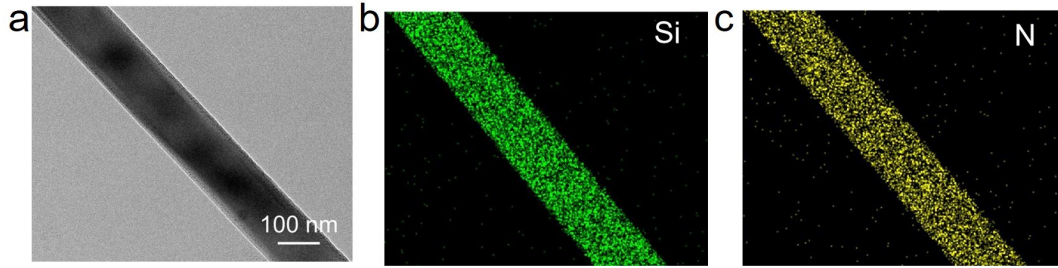

**Fig. S4** (a) TEM image of single Si<sub>3</sub>N<sub>4</sub>NW; corresponding EDS mapping images of (b) Si and (c) N elements.

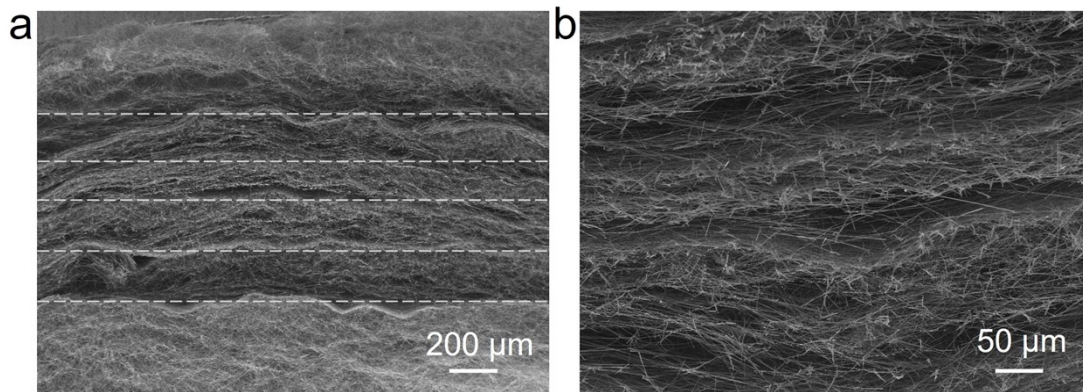

**Fig. S5** Cross-sectional SEM image of the six-layer stacked Si<sub>3</sub>N<sub>4</sub>NWs paper under different magnifications: (a) 100×, (b) 500×.

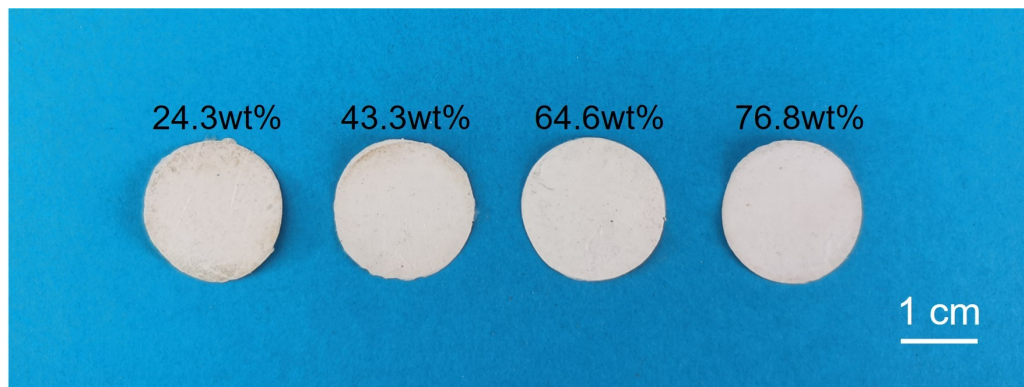

**Fig. S6** Digital pictures of various Si<sub>3</sub>N<sub>4</sub>NWs/EP composite films with different filling fractions.

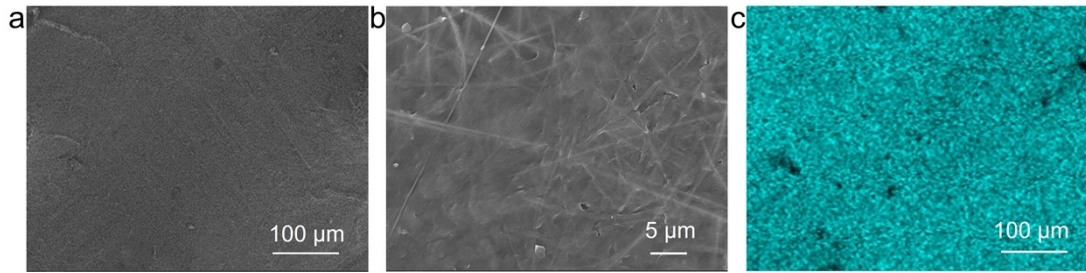

**Fig. S7** (a-b) SEM images at different magnifications and (c) Si elemental distribution on the surface of the 64.6L-Si<sub>3</sub>N<sub>4</sub>NWs/EP composite film.

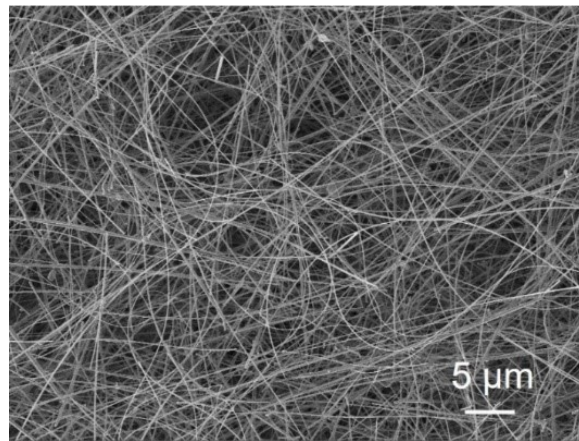

**Fig. S8** SEM image of the residual Si<sub>3</sub>N<sub>4</sub>NWs skeleton of the composite film after heat treatment at 800 °C for 2 h in air atmosphere.

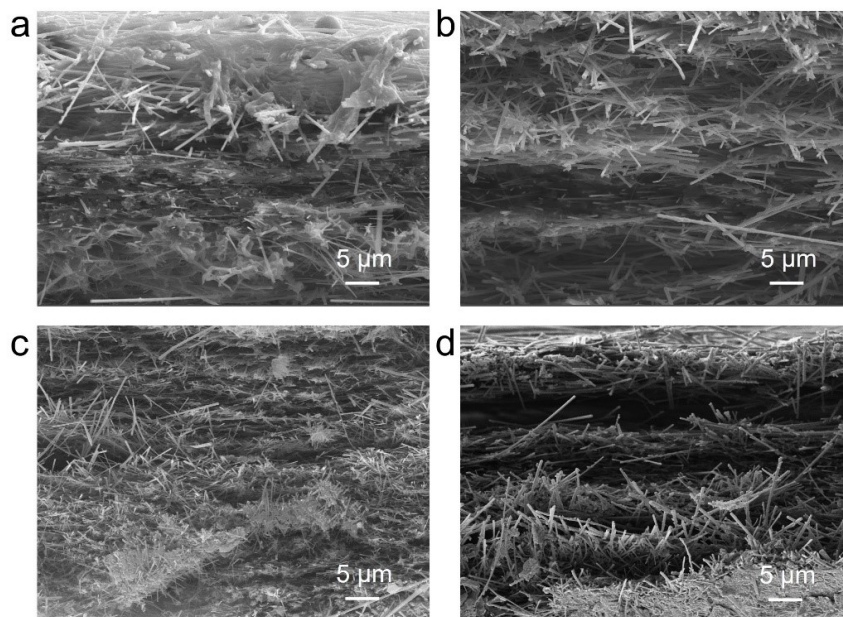

**Fig. S9** SEM images of fracture surfaces of composite films with different Si<sub>3</sub>N<sub>4</sub>NWs filling fraction: (a) 24.3 wt%; (b) 43.3 wt%; (c) 64.6 wt%; (d) 76.8 wt%.



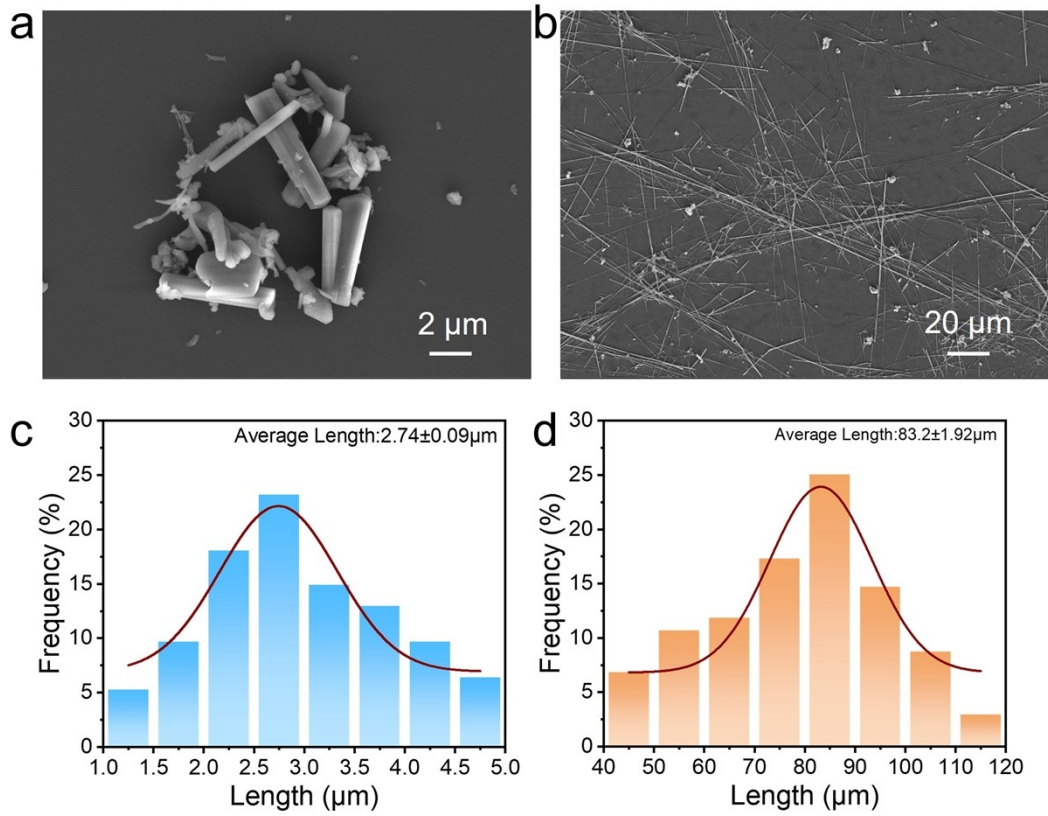

**Fig. S10** SEM images and length distribution of Si<sub>3</sub>N<sub>4</sub>Ps and S-Si<sub>3</sub>N<sub>4</sub>NWs:

(a,c) Si<sub>3</sub>N<sub>4</sub>Ps; (b,d) S-Si<sub>3</sub>N<sub>4</sub>NWs.

**Tab. S1** Density and porosity of *x*L-Si<sub>3</sub>N<sub>4</sub>NWs/EP composite films

| Composite films samples                     | Calculated density (g/cm <sup>3</sup> ) | Measured density (g/cm <sup>3</sup> ) | Porosity (vol%) |
|---------------------------------------------|-----------------------------------------|---------------------------------------|-----------------|
| 24.3L-Si <sub>3</sub> N <sub>4</sub> NWs/EP | 1.4255                                  | 1.3778                                | 3.14            |
| 43.3L-Si <sub>3</sub> N <sub>4</sub> NWs/EP | 1.7052                                  | 1.5521                                | 8.97            |
| 64.6L-Si <sub>3</sub> N <sub>4</sub> NWs/EP | 1.9244                                  | 1.7341                                | 9.89            |
| 76.8L-Si <sub>3</sub> N <sub>4</sub> NWs/EP | 2.3455                                  | 1.4246                                | 39.11           |

**Tab. S2** Comparison of the comprehensive performance between the as-prepared 64.6L-Si<sub>3</sub>N<sub>4</sub>NWs/EP composite film and some previously reported composite films.

| Composites                             | In-plane TC<br>(W·m <sup>-1</sup> ·K <sup>-1</sup> ) | Through-plane TC<br>(W·m <sup>-1</sup> ·K <sup>-1</sup> ) | Tensile stress<br>(Mpa) | Tensile strain<br>(%) | Volume resistivity<br>(Ω·cm) | References           |
|----------------------------------------|------------------------------------------------------|-----------------------------------------------------------|-------------------------|-----------------------|------------------------------|----------------------|
| AlN/ UHMWPE                            | 7.12                                                 | 1.93                                                      | 16.8                    | /                     | /                            | 2023 <sup>[S1]</sup> |
| PVDF/BN/PW                             | 0.52                                                 | /                                                         | /                       | /                     | 1.89×10 <sup>5</sup>         | 2024 <sup>[S2]</sup> |
| NH <sub>2</sub> -rGO/ PI               | 7.13                                                 | 0.74                                                      | 35.7                    | /                     | /                            | 2021 <sup>[S3]</sup> |
| Si <sub>3</sub> N <sub>4</sub> NWs/PVA | 15.4                                                 | 1.52                                                      | 3.4                     | /                     | /                            | 2023 <sup>[S4]</sup> |
| Si <sub>3</sub> N <sub>4</sub> NWs/EP  | 16.02                                                | 2.21                                                      | 37.3                    | 10.17                 | 6.68×10 <sup>9</sup>         | This work            |

[S1] S. Wan, X. Hao, C. Yu, M. Li, Z. Zhao, L. Zhu, W. Xuan, M. Yue, W. Cao and Q. Wang, *Ceram. Int.*, 2023, 49, 35094-35103.

[S2] K. Ruan, Y. Guo, C. Lu, X. Shi, T. Ma, Y. Zhang, J. Kong and J. Gu, *Research*, 2021, 2021: 8438614.

[S3] X. Zhang, K. Sun, H. Liu, J. Chen, X. Yan, Y. Kou and Q. Shi, *Nano Energy*, 2024, 121, 109256.

[S4] S. Wan, X. Hao, L. Zhu, C. Yu, M. Li, Z. Zhao, J. Kuang, M. Yue, Q. Lu, W. Cao, and Q. Wang, *ACS Appl. Mater. Interfaces*, 2023, 15, 32885-32894.
